# Supplementary material for: Highly stable drone-shaped lanthanide clusters: structure, assembly mechanism, and crystalline–amorphous transitions
Source: Royal Society of Chemistry journal article supplement (doi:10.1039/d3qi00861d), 2023-01-01
Supplement: d3qi00861d1.pdf [file d3qi00861d1.pdf]

## Supporting Information

# Highly Stable Drone-shaped Lanthanide Clusters: Structure, Assembly Mechanism and Crystalline-Amorphous Transitions

Yun-Lan Li,<sup>+</sup> Wen-Wen Qin,<sup>+</sup> Hai-Ling Wang, Zhong-Hong Zhu\*, Fu-Pei Liang, and Hua-Hong Zou\*

School of Chemistry and Pharmaceutical Sciences, State Key Laboratory for Chemistry and Molecular Engineering of Medicinal Resources, Guangxi Normal University, Guilin 541004, P. R. China \*E-mail (Corresponding author): 18317725515@163.com (Z.-H. Zhu), gxnuchem@foxmail.com (H.-H. Zou).

**Keywords:** High-nuclear lanthanide clusters; Assembly mechanism; Crystalline-amorphous transitions; Magnetic properties

## Table of Contents:

| Supporting Tables  |                                                                                                                                                                     |
|--------------------|---------------------------------------------------------------------------------------------------------------------------------------------------------------------|
| <b>Table S1</b>    | Crystallographic data of the cluster <b>1</b> .                                                                                                                     |
| <b>Table S2</b>    | Selected bond lengths (Å) and angles (°) of cluster <b>1</b> .                                                                                                      |
| <b>Table S3</b>    | <i>SHAPE</i> analysis of the Dy(III) in cluster <b>1</b> .                                                                                                          |
| <b>Table S4</b>    | Major species assigned in the Time-dependent HRESI-MS of cluster <b>1</b> in positive mode.                                                                         |
| Supporting Figures |                                                                                                                                                                     |
| <b>Figure S1</b>   | Using CCDC's literature survey results for $\mu$ -Cl <sup>-</sup> , $\mu_2$ -Cl <sup>-</sup> , $\mu_3$ -Cl <sup>-</sup> , and $\mu_4$ -Cl <sup>-</sup> .            |
| <b>Figure S2</b>   | TG curve of cluster <b>1</b> .                                                                                                                                      |
| <b>Figure S3</b>   | SEM image of cluster <b>1</b> (a-b) and after 720 min (c-d).                                                                                                        |
| <b>Figure S4</b>   | Time-dependent HRESI-MS spectra for the assembly of cluster <b>1</b> in positive mode.                                                                              |
| <b>Figure S5</b>   | HRESI-MS spectrum of cluster <b>1</b> at different temperatures (a), the intensity of each fragment varies with temperature (b).                                    |
| <b>Figure S6</b>   | UV-Vis spectrograms of cluster <b>1</b> after exposing to atmosphere at different times.                                                                            |
| <b>Figure S7</b>   | Loop curve graph of cluster <b>1</b> at 2 K.                                                                                                                        |
| <b>Figure S8</b>   | Temperature dependence of the real ( $\chi'$ ) and imaginary ( $\chi''$ ) ac susceptibilities at different frequencies in the 0 Oe dc fields for cluster <b>1</b> . |

## Experimental Section

### Materials and Measurements.

All reagents were obtained from commercial sources and used without further purification. Elemental analyses for C, and H were performed on a varia MICRO cube. The infrared spectra were carried out on a Pekin-Elmer Two spectrophotometer with pressed KBr pellets. The X-ray powder diffraction (XRD) spectra were measured on a Rigaku D/Max-3c diffractometer with Mo K $\alpha$  radiation ( $\lambda = 0.71073 \text{ \AA}$ ). Thermogravimetric analyses were performed on a PerkinElmer PyrisDiamond TG-DTA instrument under an N<sub>2</sub> atmosphere using a heating rate of 5 °C min<sup>-1</sup> from room temperature up to 1000 °C. Magnetic properties were performed on a Superconducting Quantum Interference Device (SQUID) magnetometer. The diamagnetism of all constituent atoms was corrected with Pascal's constant.

### Single crystal X-ray crystallography.

Diffraction data for the complex were collected on a ROD, Synergy Custom DW system, HyPix diffractometer (Mo-K $\alpha$  radiation and  $\lambda = 0.71073 \text{ \AA}$ ) in  $\Phi$  and  $\omega$  scan modes. The structures were solved by direct methods, and refined by a full-matrix least-squares method on the basis of  $F^2$  by using SHELXL. Anisotropic thermal parameters were applied to all non-hydrogen atoms. Hydrogen atoms were generated geometrically. The crystallographic data for clusters **1** are listed in Table S1, and selected bond lengths and angles are given in Table S2. The CCDC reference number for the crystal structures of cluster **1** is 2260488.

### HRESI-MS measurement.

HRESI-MS measurements were conducted at a capillary temperature of 275 °C. Aliquots of the solution were injected into the device at 2  $\mu\text{L}$ . The mass spectrometer used for the measurements was a ThermoExactive and the data were collected in positive and negative ion modes. The spectrometer was previously calibrated with the standard tune mix to give a precision of *ca.* 2 ppm. within the region of  $m/z = 200\text{--}4000$ . The capillary voltage was 50 V, the tube lens voltage was 150 V, and the skimmer voltage was 25 V.

[1] Sheldrick, G. M. *Acta Crystallogr., Sect. C: Struct. Chem.* **2015**, *71*, 3-8.

### **The synthesis method.**

**Synthesis of 1:** A mixture of 2-pyridinecarbohydrazide (0.2 mmol, 27.4 mg), 2,3,4-trihydroxybenzaldehyde (0.2 mmol, 30.8 mg) and mixed metal salt ( $\text{Dy}(\text{NO}_3)_3 \cdot 6\text{H}_2\text{O} : \text{DyCl}_3 \cdot 6\text{H}_2\text{O} = 1:1$ ) and triethylamine (60  $\mu\text{L}$ ) were dissolved in mixed solvent ( $\text{CH}_3\text{OH} : \text{CH}_3\text{CN} = 1:1$ ) in a Pyrex tube. The tube was sealed and heated at 80 °C in an oven for 2 days, brown-red crystals were observed with a yield of about 46% (based on  $\text{Dy}(\text{NO}_3)_3 \cdot 6\text{H}_2\text{O}$ ). Elemental analysis theoretical value ( $\text{C}_{116}\text{H}_{116}\text{Cl}_2\text{Dy}_9\text{N}_{24}\text{O}_{48}$ ): C, 33.56%; H, 2.79%; N, 8.10%; experimental value: C, 33.52%; H, 2.71%; N, 8.06%. Infrared spectrum data (IR, KBr pellet,  $\text{cm}^{-1}$ ): 3855 (m), 3750 (s), 3404 (m), 1612 (m), 1574 (m), 1441 (m), 1383 (w), 1269 (w), 1069 (m), 1029 (s), 737 (m), 628 (m), 543 (m).

**Table S1.** Crystallographic data of the cluster **1**.

|                                                                          | <b>1</b>                                                                                          |
|--------------------------------------------------------------------------|---------------------------------------------------------------------------------------------------|
| Empirical formula                                                        | C <sub>116</sub> H <sub>116</sub> Cl <sub>2</sub> Dy <sub>9</sub> N <sub>24</sub> O <sub>48</sub> |
| Formula weight                                                           | 4147.72                                                                                           |
| <i>T</i> , K                                                             | 293(2)                                                                                            |
| Crystal system                                                           | tetragonal                                                                                        |
| Space group                                                              | <i>P</i> 4/n                                                                                      |
| <i>a</i> , Å                                                             | 25.0121(4)                                                                                        |
| <i>b</i> , Å                                                             | 25.0121(4)                                                                                        |
| <i>c</i> , Å                                                             | 14.3000(7)                                                                                        |
| $\alpha$ , °                                                             | 90                                                                                                |
| $\beta$ , °                                                              | 90                                                                                                |
| $\gamma$ , °                                                             | 90                                                                                                |
| <i>V</i> , Å <sup>3</sup>                                                | 8946.2(5)                                                                                         |
| <i>Z</i>                                                                 | 2                                                                                                 |
| <i>D</i> <sub>c</sub> , g cm <sup>3</sup>                                | 1.575                                                                                             |
| $\mu$ , mm <sup>-1</sup>                                                 | 3.809                                                                                             |
| <i>F</i> (000)                                                           | 3984.0                                                                                            |
| 2 $\theta$ range for data collection/°                                   | 4.606 to 50.05                                                                                    |
| Reflns coll.                                                             | 33549                                                                                             |
| Unique reflns                                                            | 7896                                                                                              |
| <i>R</i> <sub>int</sub>                                                  | 0.0456                                                                                            |
| <i>R</i> <sub>1</sub> <sup>a</sup> ( <i>I</i> > 2 $\sigma$ ( <i>I</i> )) | 0.0649                                                                                            |
| <i>wR</i> <sub>2</sub> <sup>b</sup> (all data)                           | 0.1855                                                                                            |
| GOF                                                                      | 1.051                                                                                             |

$${}^a R_1 = \Sigma ||F_o| - |F_c|| / \Sigma |F_o|, {}^b wR_2 = [\Sigma w(F_o^2 - F_c^2)^2 / \Sigma w(F_o^2)^2]^{1/2}$$

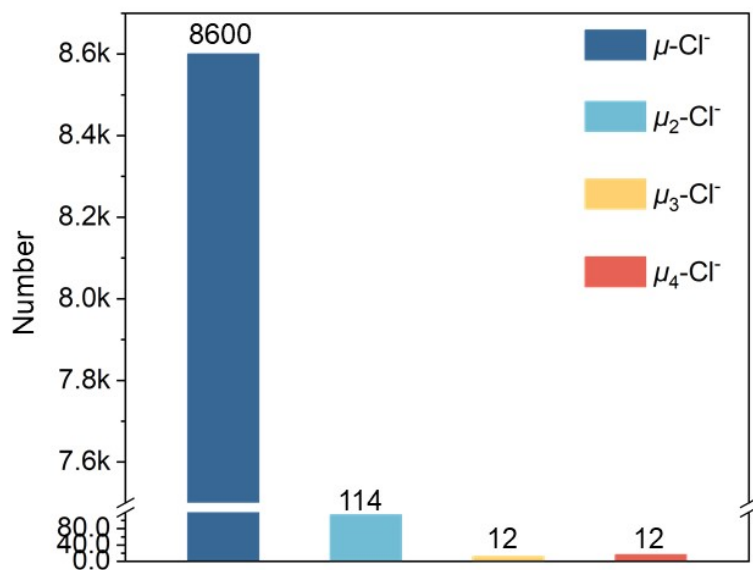

**Figure S1.** Using CCDC's literature survey results for  $\mu\text{-Cl}^-$ ,  $\mu_2\text{-Cl}^-$ ,  $\mu_3\text{-Cl}^-$ , and  $\mu_4\text{-Cl}^-$ .

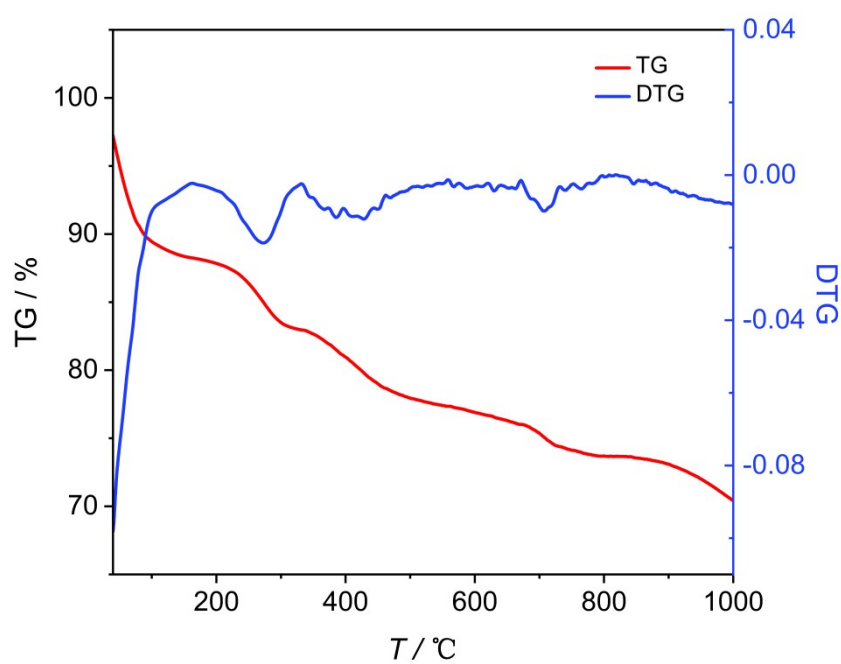

**Figure S2.** TG-DTG curves of cluster 1.

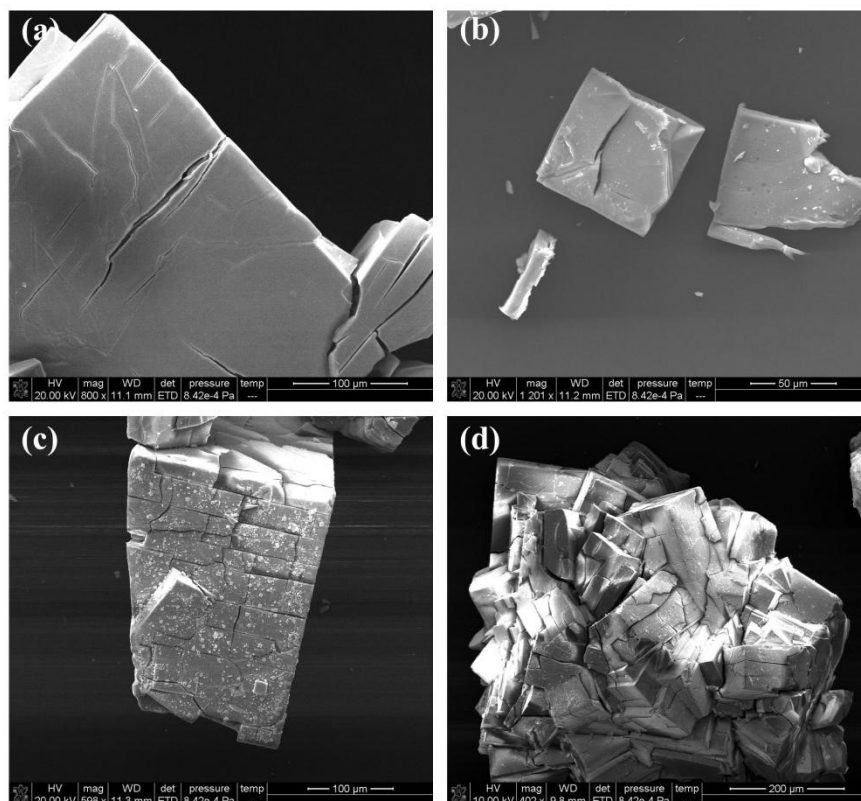

Figure S3. SEM image of cluster 1 (a-b) and after 720 min (c-d).

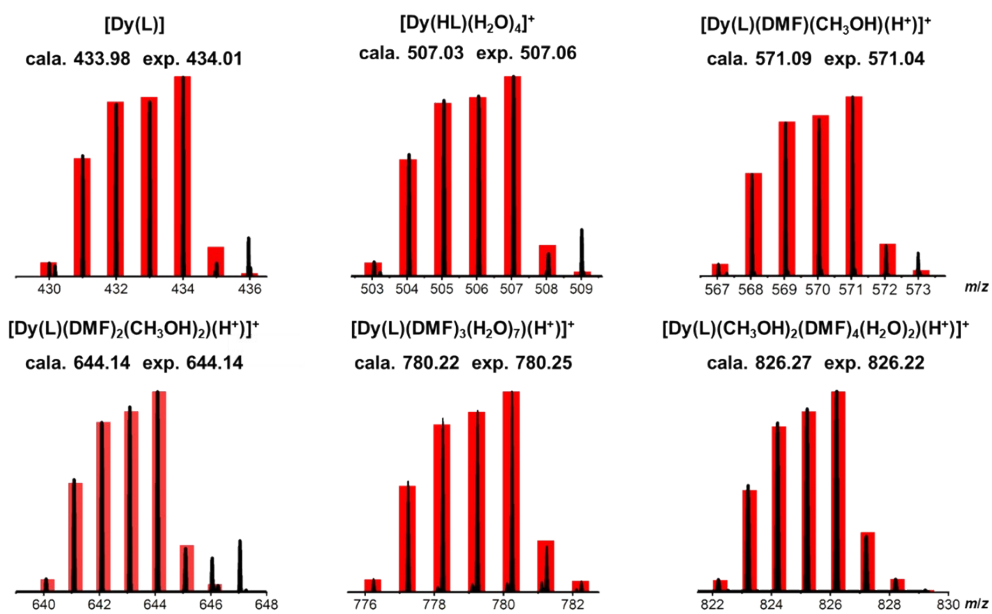

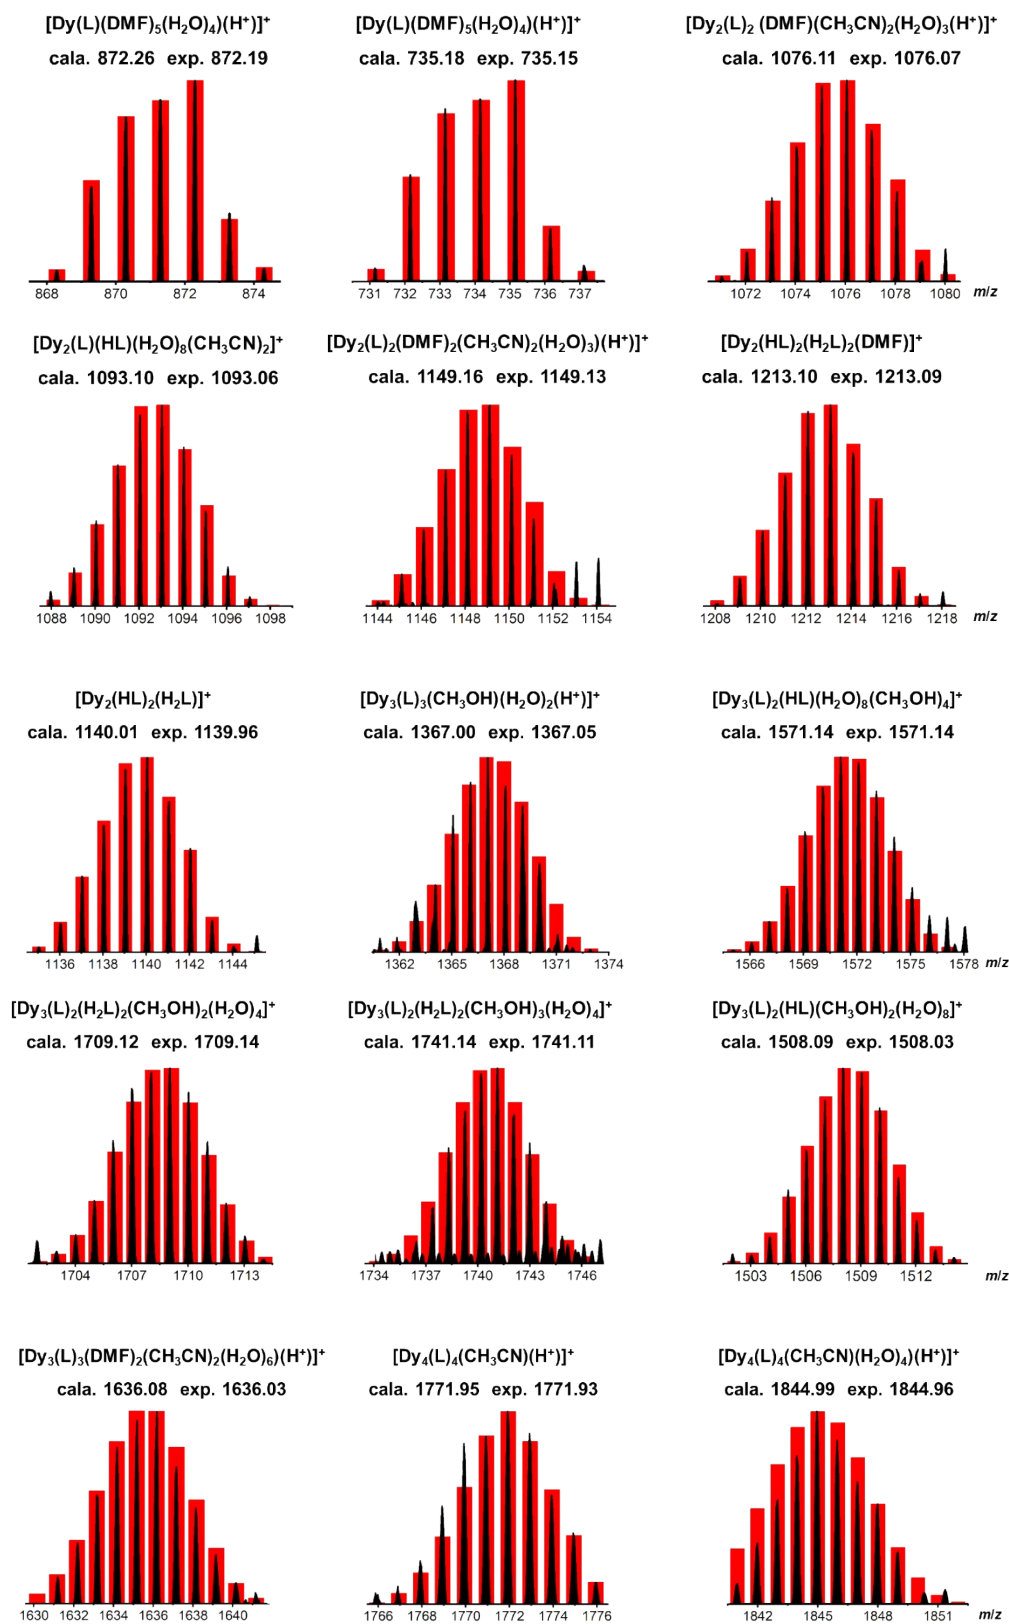

**Figure S4.** Time-dependent HRESI-MS spectra for the assembly of cluster 1 in positive mode.



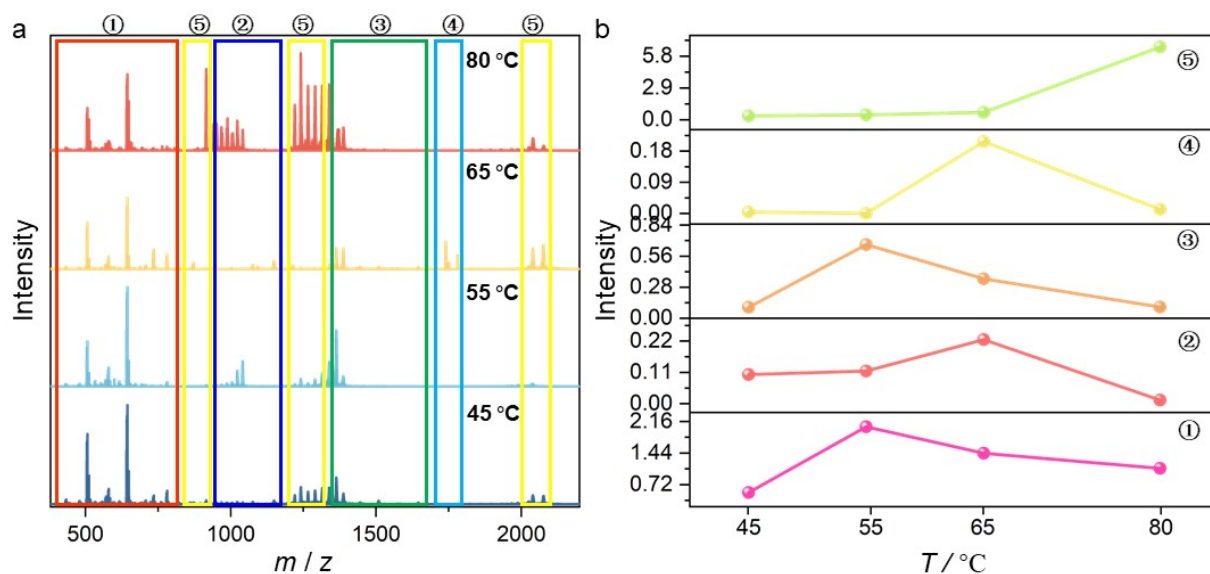

① :  $[\text{Dy}(\text{L})/(\text{HL})]^+$  ② :  $[\text{Dy}_2(\text{L})_2/(\text{HL})(\text{H}_2\text{L})_2]^+$  ③ :  $[\text{Dy}_3(\text{L})_n/(\text{HL})_n/(\text{H}_2\text{L})_n]^+$  ④ :  $[\text{Dy}_4(\text{L})_4]^+$  ⑤ :  $[\text{Dy}_9(\text{L})_9]$

**Figure S5.** HRESI-MS spectrum of cluster 1 at different temperatures (a), the intensity of each fragment varies with temperature (b).

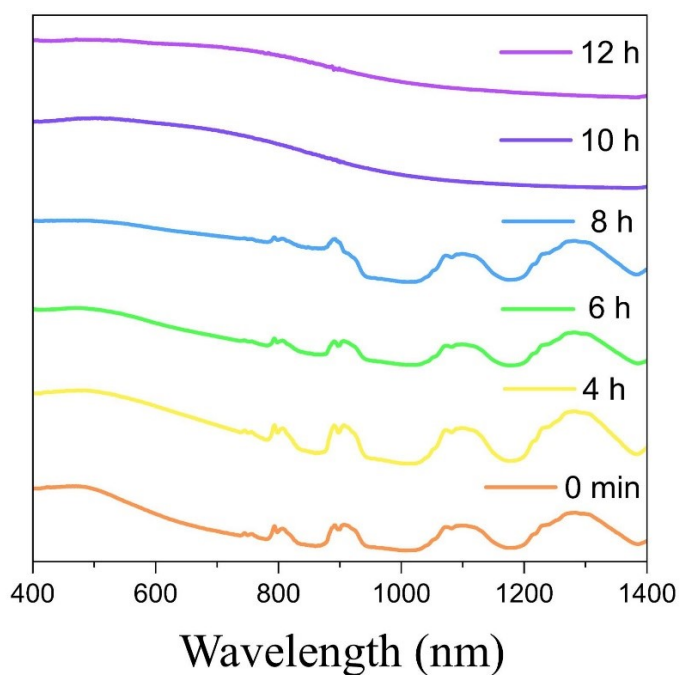

**Figure S6.** UV-Vis spectrograms of cluster 1 after exposing to air at different times.

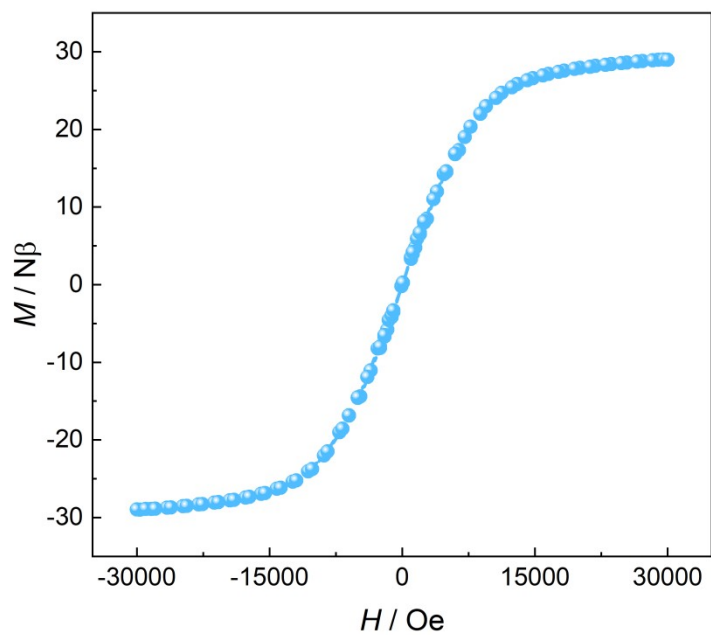

**Figure S7.** Loop curve graph of cluster **1** at 2 K.

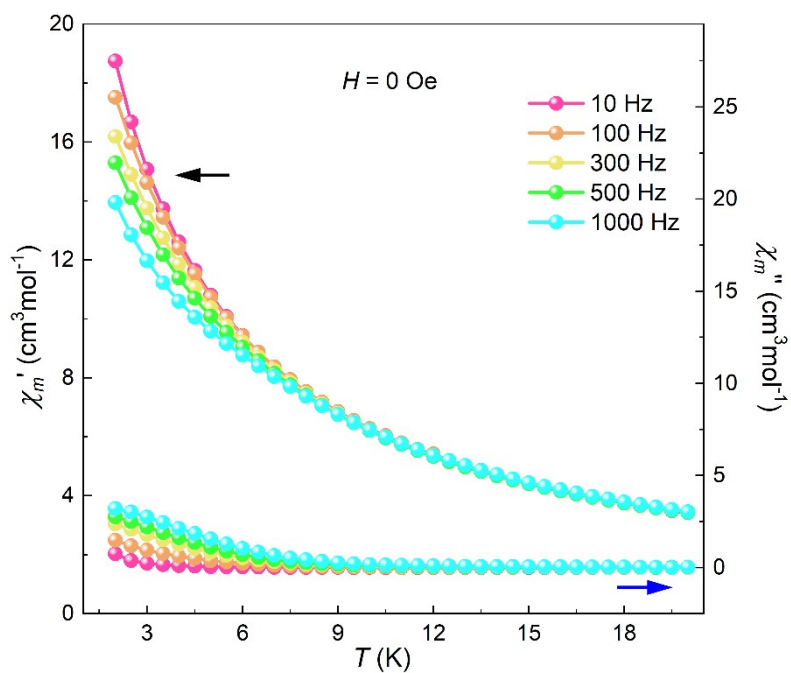

**Figure S8.** Temperature dependence of the real ( $\chi'$ ) and imaginary ( $\chi''$ ) ac susceptibilities at different frequencies in the 0 Oe dc fields for cluster **1**.

**Table S2.** Selected bond lengths (Å) and angles (°) of cluster 1.

| <b>Bond lengths (Å)</b>   |           |                          |           |                         |           |
|---------------------------|-----------|--------------------------|-----------|-------------------------|-----------|
| Dy1-O4                    | 2.288(8)  | Dy2 <sup>iii</sup> -O1   | 2.363(8)  | Dy4 <sup>iii</sup> -O1  | 2.520(13) |
| Dy1-O1 <sup>ii</sup>      | 2.334(9)  | Dy2 <sup>i</sup> -Cl1    | 2.901(3)  | Dy4-N6                  | 2.625(11) |
| Dy1-O9                    | 2.351(9)  | Dy2 <sup>iii</sup> -Cl1  | 2.901(3)  | Dy4-O1 <sup>ii</sup>    | 2.520(13) |
| Dy1-O10                   | 2.380(8)  | Dy2 <sup>ii</sup> -Cl1   | 2.901(3)  | Dy4-O5                  | 2.214(16) |
| Dy1-O6                    | 2.393(10) | Dy2 <sup>iii</sup> -O2   | 2.248(9)  | Dy5-Cl1                 | 2.894(6)  |
| Dy1-O7                    | 2.413(8)  | Dy3-O11                  | 2.373(7)  | Dy5 <sup>i</sup> -Cl1   | 2.894(6)  |
| Dy1-O5                    | 2.501(10) | Dy3-O11 <sup>i</sup>     | 2.373(7)  | Dy5 <sup>iii</sup> -Cl1 | 2.894(6)  |
| Dy1-N1                    | 2.578(11) | Dy3-O11 <sup>ii</sup>    | 2.373(7)  | Dy5 <sup>ii</sup> -Cl1  | 2.894(6)  |
| Dy1-N6                    | 2.605(10) | Dy3-O11 <sup>iii</sup>   | 2.373(7)  | Dy5-O11                 | 2.364(10) |
| Dy1 <sup>iii</sup> -O1    | 2.334(8)  | Dy3-O13 <sup>i</sup>     | 2.507(9)  | Dy5-O2                  | 2.183(12) |
| Dy2-O2 <sup>ii</sup>      | 2.249(9)  | Dy3-O13 <sup>iii</sup>   | 2.507(9)  | Dy5 <sup>iii</sup> -O2  | 2.440(12) |
| Dy2-O10                   | 2.313(8)  | Dy3-O13 <sup>ii</sup>    | 2.507(9)  | Dy5-O3                  | 2.519(11) |
| Dy2-O4                    | 2.318(9)  | Dy3-O13                  | 2.507(9)  | Dy5 <sup>iii</sup> -O1  | 2.474(11) |
| Dy2-O11                   | 2.335(8)  | Dy3-Cl1                  | 2.934(5)  | Dy5-O4                  | 2.202(11) |
| Dy2-O1 <sup>ii</sup>      | 2.363(8)  | Dy4-O7                   | 2.400(9)  | Dy5-O2 <sup>ii</sup>    | 2.440(12) |
| Dy2-O2                    | 2.386(8)  | Dy4-O6                   | 2.538(13) | Dy5-O1 <sup>ii</sup>    | 2.474(11) |
| Dy2-O3                    | 2.554(9)  | Dy4-O9                   | 2.652(16) |                         |           |
| Dy2-Cl1                   | 2.901(3)  | Dy4-O4                   | 2.121(11) |                         |           |
| <b>Bond angles (°)</b>    |           |                          |           |                         |           |
| O4-Dy1-O1 <sup>ii</sup>   | 68.0(3)   | O4-Dy2-O1 <sup>ii</sup>  | 67.1(3)   | O4-Dy4-O5               | 82.9(6)   |
| O4-Dy1-O9                 | 142.8(3)  | O11-Dy2-O1 <sup>ii</sup> | 130.8(3)  | O4-Dy4-N1               | 73.6(4)   |
| O1 <sup>ii</sup> -Dy1-O9  | 76.2(3)   | O2 <sup>ii</sup> -Dy2-O2 | 144.0(3)  | O5-Dy4-N1               | 78.1(6)   |
| O4-Dy1-O10                | 70.3(3)   | O10-Dy2-O2               | 108.4(3)  | O4-Dy4-O7               | 149.9(7)  |
| O1 <sup>ii</sup> -Dy1-O10 | 69.0(3)   | O4-Dy2-O2                | 68.8(3)   | O5-Dy4-O7               | 76.9(4)   |
| O9-Dy1-O10                | 87.9(3)   | O11-Dy2-O2               | 86.6(3)   | N1-Dy4-O7               | 80.5(4)   |
| O4-Dy1-O6                 | 112.4(3)  | O1 <sup>ii</sup> -Dy2-O2 | 133.6(3)  | O4-Dy4-O1 <sup>ii</sup> | 67.1(4)   |
| O1 <sup>ii</sup> -Dy1-O6  | 83.2(3)   | O2 <sup>ii</sup> -Dy2-O3 | 81.6(3)   | O5-Dy4-O1 <sup>ii</sup> | 146.9(5)  |
| O9-Dy1-O6                 | 71.9(3)   | O10-Dy2-O3               | 144.6(3)  | N1-Dy4-O1 <sup>ii</sup> | 104.9(4)  |
| O10-Dy1-O6                | 149.0(3)  | O4-Dy2-O3                | 80.5(3)   | O7-Dy4-O1 <sup>ii</sup> | 136.1(6)  |
| O4-Dy1-O7                 | 136.5(3)  | O11-Dy2-O3               | 144.2(3)  | O4-Dy4-O6               | 113.0(4)  |
| O1 <sup>ii</sup> -Dy1-O7  | 148.1(3)  | O1 <sup>ii</sup> -Dy2-O3 | 80.4(3)   | O5-Dy4-O6               | 130.3(5)  |
| O9-Dy1-O7                 | 80.5(3)   | O2-Dy2-O3                | 79.0(3)   | N1-Dy4-O6               | 63.8(4)   |

|                           |          |                                           |           |                                        |          |
|---------------------------|----------|-------------------------------------------|-----------|----------------------------------------|----------|
| O10-Dy1-O7                | 131.9(3) | O10-Dy2-O1 <sup>ii</sup>                  | 69.7(3)   | O7-Dy4-O6                              | 66.8(4)  |
| O6-Dy1-O7                 | 68.9(3)  | O11 <sup>ii</sup> -Dy3-Cl1                | 68.95(18) | O1 <sup>ii</sup> -Dy4-O6               | 76.7(4)  |
| O4-Dy1-O5                 | 73.5(3)  | O11 <sup>iii</sup> -Dy3-Cl1               | 68.95(18) | O4-Dy4-N6                              | 128.7(5) |
| O1 <sup>ii</sup> -Dy1-O5  | 139.7(3) | O13 <sup>i</sup> -Dy3-Cl1                 | 131.4(2)  | O5-Dy4-N6                              | 70.4(4)  |
| O9-Dy1-O5                 | 137.0(3) | O13 <sup>iii</sup> -Dy3-Cl1               | 131.4(2)  | N1-Dy4-N6                              | 136.7(5) |
| O10-Dy1-O5                | 87.3(3)  | O13 <sup>ii</sup> -Dy3-Cl1                | 131.4(2)  | O7-Dy4-N6                              | 64.3(3)  |
| O6-Dy1-O5                 | 123.6(4) | O13-Dy3-Cl1                               | 131.4(2)  | O1 <sup>ii</sup> -Dy4-N6               | 117.8(5) |
| O7-Dy1-O5                 | 71.5(3)  | O11 <sup>i</sup> -Dy3-O13                 | 151.1(3)  | O6-Dy4-N6                              | 117.8(5) |
| O4-Dy1-N1                 | 67.5(3)  | O11 <sup>ii</sup> -Dy3-O13                | 121.7(3)  | O4-Dy4-O9                              | 133.9(5) |
| O1 <sup>ii</sup> -Dy1-N1  | 104.9(3) | O11 <sup>iii</sup> -Dy3-O13               | 87.1(3)   | O5-Dy4-O9                              | 136.1(4) |
| O9-Dy1-N1                 | 134.3(4) | O13 <sup>i</sup> -Dy3-O13                 | 97.2(4)   | N1-Dy4-O9                              | 128.3(5) |
| O10-Dy1-N1                | 136.1(3) | O13 <sup>iii</sup> -Dy3-O13               | 64.1(2)   | O7-Dy4-O9                              | 74.9(4)  |
| O6-Dy1-N1                 | 63.2(4)  | O13 <sup>ii</sup> -Dy3-O13                | 64.1(2)   | O1 <sup>ii</sup> -Dy4-O9               | 67.9(4)  |
| O7-Dy1-N1                 | 76.6(3)  | O11-Dy3-Cl1                               | 68.95(18) | O6-Dy4-O9                              | 64.9(4)  |
| O5-Dy1-N1                 | 69.8(4)  | O11 <sup>i</sup> -Dy3-Cl1                 | 68.95(18) | N6-Dy4-O9                              | 67.2(4)  |
| O4-Dy1-N6                 | 122.1(3) | O11-Dy3-O13 <sup>ii</sup>                 | 87.1(3)   | O2-Dy5-O4                              | 74.7(4)  |
| O1 <sup>ii</sup> -Dy1-N6  | 126.2(3) | O11 <sup>i</sup> -Dy3-O13 <sup>ii</sup>   | 121.7(3)  | O2-Dy5-O11                             | 90.7(4)  |
| O9-Dy1-N6                 | 72.0(3)  | O11 <sup>ii</sup> -Dy3-O13 <sup>ii</sup>  | 66.4(3)   | O4-Dy5-O11                             | 128.5(4) |
| O10-Dy1-N6                | 67.5(3)  | O11 <sup>iii</sup> -Dy3-O13 <sup>ii</sup> | 151.1(3)  | O2-Dy5-O2 <sup>ii</sup>                | 144.8(4) |
| O6-Dy1-N6                 | 124.3(3) | O13 <sup>i</sup> -Dy3-O13 <sup>ii</sup>   | 64.1(2)   | O4-Dy5-O2 <sup>ii</sup>                | 132.2(4) |
| O7-Dy1-N6                 | 64.4(3)  | O13 <sup>iii</sup> -Dy3-O13 <sup>ii</sup> | 97.2(4)   | O11-Dy5-O2 <sup>ii</sup>               | 86.6(4)  |
| O5-Dy1-N6                 | 66.7(3)  | O11-Dy3-O13                               | 66.4(3)   | O2-Dy5-O1 <sup>ii</sup>                | 139.1(4) |
| N1-Dy1-N6                 | 128.4(4) | O13 <sup>i</sup> -Dy3-O13 <sup>iii</sup>  | 64.1(2)   | O4-Dy5-O1 <sup>ii</sup>                | 66.9(4)  |
| O1 <sup>ii</sup> -Dy2-Cl1 | 139.2(2) | O11-Dy3-O11 <sup>i</sup>                  | 137.9(4)  | O11-Dy5-O1 <sup>ii</sup>               | 123.9(4) |
| O2-Dy2-Cl1                | 72.0(2)  | O11-Dy3-O11 <sup>ii</sup>                 | 82.59(12) | O2 <sup>ii</sup> -Dy5-O1 <sup>ii</sup> | 66.3(3)  |
| O3-Dy2-Cl1                | 74.4(2)  | O11 <sup>i</sup> -Dy3-O11 <sup>ii</sup>   | 82.59(12) | O2-Dy5-O3                              | 83.6(4)  |
| O4-Dy2-Cl1                | 136.6(2) | O11-Dy3-O11 <sup>iii</sup>                | 82.59(12) | O4-Dy5-O3                              | 83.5(4)  |
| O11-Dy2-Cl1               | 70.0(2)  | O11 <sup>i</sup> -Dy3-O11 <sup>iii</sup>  | 82.59(12) | O11-Dy5-O3                             | 144.7(4) |
| O2 <sup>ii</sup> -Dy2-Cl1 | 73.7(2)  | O11 <sup>ii</sup> -Dy3-O11 <sup>iii</sup> | 137.9(4)  | O2 <sup>ii</sup> -Dy5-O3               | 78.8(3)  |
| O10-Dy2-Cl1               | 141.0(2) | O11-Dy3-O13 <sup>i</sup>                  | 151.1(3)  | O1 <sup>ii</sup> -Dy5-O3               | 79.0(3)  |
| O2 <sup>ii</sup> -Dy2-O10 | 105.0(3) | O11 <sup>i</sup> -Dy3-O13 <sup>i</sup>    | 66.4(3)   | O2-Dy5-Cl1                             | 74.8(3)  |
| O2 <sup>ii</sup> -Dy2-O4  | 136.7(3) | O11 <sup>ii</sup> -Dy3-O13 <sup>i</sup>   | 87.1(3)   | O4-Dy5-Cl1                             | 144.3(4) |
| O10-Dy2-O4                | 71.0(3)  | O11 <sup>iii</sup> -Dy3-O13 <sup>i</sup>  | 121.7(3)  | O11-Dy5-Cl1                            | 69.8(3)  |

|                                        |          |                                            |          |                           |          |
|----------------------------------------|----------|--------------------------------------------|----------|---------------------------|----------|
| O2 <sup>ii</sup> -Dy2-O11              | 91.9(3)  | O11-Dy3-O13 <sup>iii</sup>                 | 121.7(3) | O2 <sup>ii</sup> -Dy5-Cl1 | 71.4(2)  |
| O10-Dy2-O11                            | 71.0(3)  | O11 <sup>i</sup> -Dy3-O13 <sup>iii</sup>   | 87.1(3)  | O1 <sup>ii</sup> -Dy5-Cl1 | 133.6(4) |
| O4-Dy2-O11                             | 124.2(3) | O11 <sup>ii</sup> -Dy3-O13 <sup>iii</sup>  | 151.1(3) | O3-Dy5-Cl1                | 75.1(3)  |
| O2 <sup>ii</sup> -Dy2-O1 <sup>ii</sup> | 71.2(3)  | O11 <sup>iii</sup> -Dy3-O13 <sup>iii</sup> | 66.4(3)  |                           |          |

**Table S3.** *SHAPE* analysis of the Dy(III) in cluster 1.

| Label    | Shape    | Symmetry                                     | Distortion (°)<br>Dy1 |
|----------|----------|----------------------------------------------|-----------------------|
| EP-9     | $D_{9h}$ | Enneagon                                     | 35.359                |
| OPY-9    | $C_{8v}$ | Octagonal pyramid                            | 25.136                |
| HBPY-9   | $D_{7h}$ | Heptagonal bipyramid                         | 17.247                |
| JTC-9    | $C_{3v}$ | Triangular cupola J3                         | 16.363                |
| JCCU-9   | $C_{4v}$ | Capped cube (J8)                             | 3.528                 |
| CCU-9    | $C_4$    | Capped cube                                  | 3.245                 |
| JCSAPR-9 | $C_{4v}$ | Capped sq. antiprism                         | 2.595                 |
| CSAPR-9  | $C_{4v}$ | Capped square antiprism                      | 2.612                 |
| JTCTPR-9 | $D_{3h}$ | Tricapped trigonal prism J51                 | 4.254                 |
| TCTPR-9  | $D_{3h}$ | Tricapped trigonal prism                     | 3.918                 |
| JTDIC-9  | $C_{3v}$ | Tridiminished icosahedron J63                | 13.641                |
| HH-9     | $C_{2v}$ | Hula-hoop                                    | 9.209                 |
| MFF-9    | $C_s$    | Muffin                                       | 3.309                 |
| Label    | Shape    | Symmetry                                     | Distortion (°)<br>Dy2 |
| OP-8     | $D_{8h}$ | Octagon                                      | 44.543                |
| HPY-8    | $C_{7v}$ | Heptagonal pyramid                           | 34.731                |
| HBPY-8   | $D_{6h}$ | Hexagonal bipyramid                          | 31.851                |
| CU-8     | $O_h$    | Cube                                         | 33.204                |
| SAPR-8   | $D_{4d}$ | Square antiprism                             | 26.712                |
| TDD-8    | $D_{2d}$ | Triangular dodecahedron                      | 25.028                |
| JGBF-8   | $D_{2d}$ | Johnson-Gyrobifastigium (J26)                | 30.173                |
| JETBPY-8 | $D_{3h}$ | Johnson-Elongated triangular bipyramid (J14) | 39.148                |
| JBTP-8   | $C_{2v}$ | Johnson-Biaugmented trigonal prism (J50)     | 23.235                |
| BTPR-8   | $C_{2v}$ | Biaugmen tedtrigonal prism                   | 24.692                |
| JSD-8    | $D_{2d}$ | Snub disphenoid (J84)                        | 23.435                |
| TT-8     | $T_d$    | Triakis tetrahedron                          | 31.640                |
| ETBPY-8  | $D_{3h}$ | Elongated trigonal bipyramid                 | 39.560                |
| Label    | Shape    | Symmetry                                     | Distortion (°)<br>Dy3 |
| EP-9     | $D_{9h}$ | Enneagon                                     | 43.947                |
| OPY-9    | $C_{8v}$ | Octagonal pyramid                            | 34.007                |
| HBPY-9   | $D_{7h}$ | Heptagonal bipyramid                         | 33.529                |
| JTC-9    | $C_{3v}$ | Triangular cupola J3                         | 23.678                |

|          |          |                               |        |
|----------|----------|-------------------------------|--------|
| JCCU-9   | $C_{4v}$ | Capped cube (J8)              | 27.364 |
| CCU-9    | $C_4$    | Capped cube                   | 26.975 |
| JCSAPR-9 | $C_{4v}$ | Capped sq. antiprism          | 20.866 |
| CSAPR-9  | $C_{4v}$ | Capped square antiprism       | 20.952 |
| JTCTPR-9 | $D_{3h}$ | Tricapped trigonal prism J51  | 20.560 |
| TCTPR-9  | $D_{3h}$ | Tricapped trigonal prism      | 21.287 |
| JTDIC-9  | $C_{3v}$ | Tridiminished icosahedron J63 | 29.525 |
| HH-9     | $C_{2v}$ | Hula-hoop                     | 27.757 |
| MFF-9    | $C_s$    | Muffin                        | 21.479 |

**Table S4.** Major species assigned in the Time-dependent HRESI-MS of cluster **1** in positive mode.

| Peaks                                                                                                                                                                                                 | <i>Exp. m/z</i> | <i>Calc. m/z</i> |
|-------------------------------------------------------------------------------------------------------------------------------------------------------------------------------------------------------|-----------------|------------------|
| [Dy(L)]                                                                                                                                                                                               | 434.01          | 433.98           |
| [Dy(HL)(H <sub>2</sub> O) <sub>4</sub> ] <sup>+</sup>                                                                                                                                                 | 507.06          | 507.03           |
| [Dy(L)(DMF)(CH <sub>3</sub> OH)(H <sup>+</sup> ) <sup>+</sup>                                                                                                                                         | 571.04          | 571.09           |
| [Dy(L)(DMF) <sub>2</sub> (CH <sub>3</sub> OH) <sub>2</sub> (H <sup>+</sup> ) <sup>+</sup>                                                                                                             | 644.14          | 644.14           |
| [Dy(L)(DMF) <sub>3</sub> (H <sub>2</sub> O) <sub>7</sub> (H <sup>+</sup> ) <sup>+</sup>                                                                                                               | 780.25          | 780.22           |
| [Dy(L)(CH <sub>3</sub> OH) <sub>2</sub> (DMF) <sub>4</sub> (H <sub>2</sub> O) <sub>2</sub> (H <sup>+</sup> ) <sup>+</sup>                                                                             | 826.22          | 826.27           |
| [Dy(L)(DMF) <sub>5</sub> (H <sub>2</sub> O) <sub>4</sub> (H <sup>+</sup> ) <sup>+</sup>                                                                                                               | 872.19          | 872.26           |
| [Dy(L)(DMF) <sub>5</sub> (H <sub>2</sub> O) <sub>4</sub> (H <sup>+</sup> ) <sup>+</sup>                                                                                                               | 735.15          | 735.18           |
| [Dy <sub>2</sub> (L) <sub>2</sub> (DMF)(CH <sub>3</sub> CN) <sub>2</sub> (H <sub>2</sub> O) <sub>3</sub> (H <sup>+</sup> ) <sup>+</sup>                                                               | 1076.07         | 1076.11          |
| [Dy <sub>2</sub> (L)(HL)(H <sub>2</sub> O) <sub>8</sub> (CH <sub>3</sub> CN) <sub>2</sub> ] <sup>+</sup>                                                                                              | 1093.06         | 1093.10          |
| [Dy <sub>2</sub> (L) <sub>2</sub> (DMF) <sub>2</sub> (CH <sub>3</sub> CN) <sub>2</sub> (H <sub>2</sub> O) <sub>3</sub> (H <sup>+</sup> ) <sup>+</sup>                                                 | 1149.13         | 1149.16          |
| [Dy <sub>2</sub> (HL) <sub>2</sub> (H <sub>2</sub> L) <sub>2</sub> (DMF)] <sup>+</sup>                                                                                                                | 1213.09         | 1213.10          |
| [Dy <sub>2</sub> (HL) <sub>2</sub> (H <sub>2</sub> L)] <sup>+</sup>                                                                                                                                   | 1139.96         | 1140.01          |
| [Dy <sub>3</sub> (L) <sub>3</sub> (CH <sub>3</sub> OH)(H <sub>2</sub> O) <sub>2</sub> (H <sup>+</sup> ) <sup>+</sup>                                                                                  | 1367.05         | 1367.00          |
| [Dy <sub>3</sub> (L) <sub>2</sub> (HL)(H <sub>2</sub> O) <sub>8</sub> (CH <sub>3</sub> OH) <sub>4</sub> ] <sup>+</sup>                                                                                | 1571.14         | 1571.14          |
| [Dy <sub>3</sub> (L) <sub>2</sub> (H <sub>2</sub> L) <sub>2</sub> (CH <sub>3</sub> OH) <sub>2</sub> (H <sub>2</sub> O) <sub>4</sub> ] <sup>+</sup>                                                    | 1709.14         | 1709.12          |
| [Dy <sub>3</sub> (L) <sub>2</sub> (H <sub>2</sub> L) <sub>2</sub> (CH <sub>3</sub> OH) <sub>3</sub> (H <sub>2</sub> O) <sub>4</sub> ] <sup>+</sup>                                                    | 1741.11         | 1741.14          |
| [Dy <sub>3</sub> (L) <sub>2</sub> (HL)(CH <sub>3</sub> OH) <sub>2</sub> (H <sub>2</sub> O) <sub>8</sub> ] <sup>+</sup>                                                                                | 1508.03         | 1508.09          |
| [Dy <sub>3</sub> (L) <sub>3</sub> (DMF) <sub>3</sub> (CH <sub>3</sub> CN) <sub>2</sub> (H <sub>2</sub> O) <sub>2</sub> (H <sup>+</sup> ) <sup>+</sup>                                                 | 1636.03         | 1636.08          |
| [Dy <sub>4</sub> (L) <sub>4</sub> (CH <sub>3</sub> CN)(H <sup>+</sup> ) <sup>+</sup>                                                                                                                  | 1771.93         | 1771.95          |
| [Dy <sub>4</sub> (L) <sub>4</sub> (CH <sub>3</sub> CN)(H <sub>2</sub> O) <sub>4</sub> (H <sup>+</sup> ) <sup>+</sup>                                                                                  | 1844.96         | 1844.99          |
| [Dy <sub>9</sub> (L) <sub>8</sub> Cl(CH <sub>3</sub> OH) <sub>8</sub> (H <sub>2</sub> O) <sub>2</sub> (H <sup>+</sup> ) <sub>3</sub> ] <sup>5+</sup>                                                  | 790.99          | 790.99           |
| [Dy <sub>9</sub> (L) <sub>8</sub> Cl(CH <sub>3</sub> OH) <sub>8</sub> (H <sub>2</sub> O) <sub>6</sub> (H <sup>+</sup> ) <sub>3</sub> ] <sup>5+</sup>                                                  | 805.61          | 805.61           |
| [Dy <sub>9</sub> (L) <sub>8</sub> (CH <sub>3</sub> OH) <sub>8</sub> (H <sub>2</sub> O) <sub>4</sub> (DMF) <sub>2</sub> (H <sub>2</sub> O) <sub>2</sub> (H <sup>+</sup> ) <sub>2</sub> ] <sup>5+</sup> | 835.20          | 835.24           |
| [Dy <sub>9</sub> (L) <sub>8</sub> Cl(CH <sub>3</sub> OH) <sub>8</sub> (H <sub>2</sub> O) <sub>2</sub> (H <sup>+</sup> ) <sub>2</sub> ] <sup>4+</sup>                                                  | 988.49          | 988.49           |
| [Dy <sub>9</sub> (L) <sub>8</sub> Cl(CH <sub>3</sub> OH) <sub>8</sub> (H <sub>2</sub> O) <sub>4</sub> (DMF)(H <sup>+</sup> ) <sub>2</sub> ] <sup>4+</sup>                                             | 1015.99         | 1016.01          |
| [Dy <sub>9</sub> (L) <sub>8</sub> Cl(CH <sub>3</sub> OH) <sub>9</sub> (H <sub>2</sub> O)(CH <sub>3</sub> CN) <sub>3</sub> (H <sup>+</sup> ) <sub>2</sub> ] <sup>4+</sup>                              | 1022.77         | 1022.76          |
| [Dy <sub>9</sub> (L) <sub>8</sub> Cl(CH <sub>3</sub> OH) <sub>8</sub> (H <sub>2</sub> O) <sub>5</sub> (DMF)(CH <sub>3</sub> CN) <sub>2</sub> (H <sup>+</sup> ) <sub>2</sub> ] <sup>4+</sup>           | 1040.77         | 1040.78          |
| [Dy <sub>9</sub> (L) <sub>8</sub> (CH <sub>3</sub> OH) <sub>7</sub> (H <sub>2</sub> O)] <sup>3+</sup>                                                                                                 | 1289.95         | 1289.99          |
